# Supplementary material for: Synthesis of an AlI3-doped Li2S positive electrode with superior performance in all-solid-state batteries
Source: Royal Society of Chemistry journal article supplement (doi:10.1039/d1ma01228b), 2022-01-01
Supplement: d1ma01228b1.pdf [file d1ma01228b1.pdf]

Supporting Information

Synthesis of AlI<sub>3</sub>-doped Li<sub>2</sub>S Positive Electrode with Superior  
Performance in All-Solid-State Battery

H. Gamo<sup>a</sup>, T. Maeda<sup>a</sup>, K. Hikima<sup>a</sup>, M. Deguchi<sup>c</sup>, Y. Fujita<sup>c</sup>, Y. Kawasaki<sup>c</sup>,  
A. Sakuda<sup>c</sup>, H. Muto<sup>a, b</sup>, Nguyen H. H. Phuc<sup>\* a</sup>, A. Hayashi<sup>c</sup>, M. Tatsumisago<sup>c</sup>, A. Matsuda<sup>\* a</sup>

<sup>a</sup>Department of Electrical and Electronic Information Engineering, Toyohashi University of  
Technology, 1-1 Hibarigaoka, Tempaku, Toyohashi, Aichi 441-8580, Japan

<sup>b</sup>Institute of Liberal Arts and Science, Toyohashi University of Technology, 1-1 Hibarigaoka,  
Tempaku, Toyohashi, Aichi 441-8580, Japan

<sup>c</sup>Department of Applied Chemistry, Graduate School of Engineering, Osaka Prefecture  
University, Osaka 599-8531, Japan

\* Corresponding authors: matsuda@ee.tut.ac.jp (A. Matsuda), nhphuc@hcmut.edu.vn  
(Nguyen H. H. Phuc)

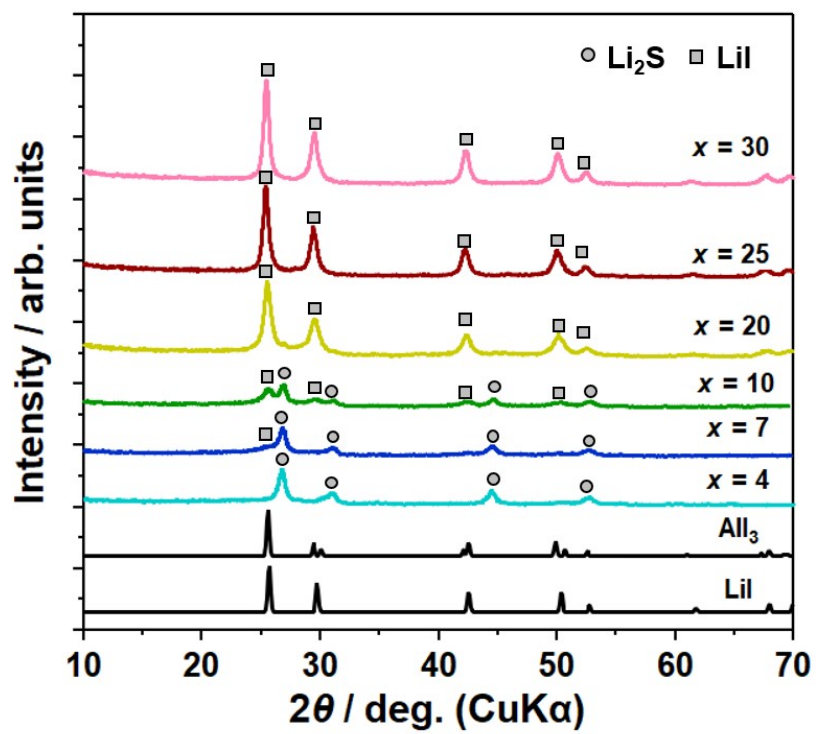

Fig. S1. X-ray diffraction patterns of  $(100-x)\text{Li}_2\text{S} \cdot x\text{AlI}_3$  samples.

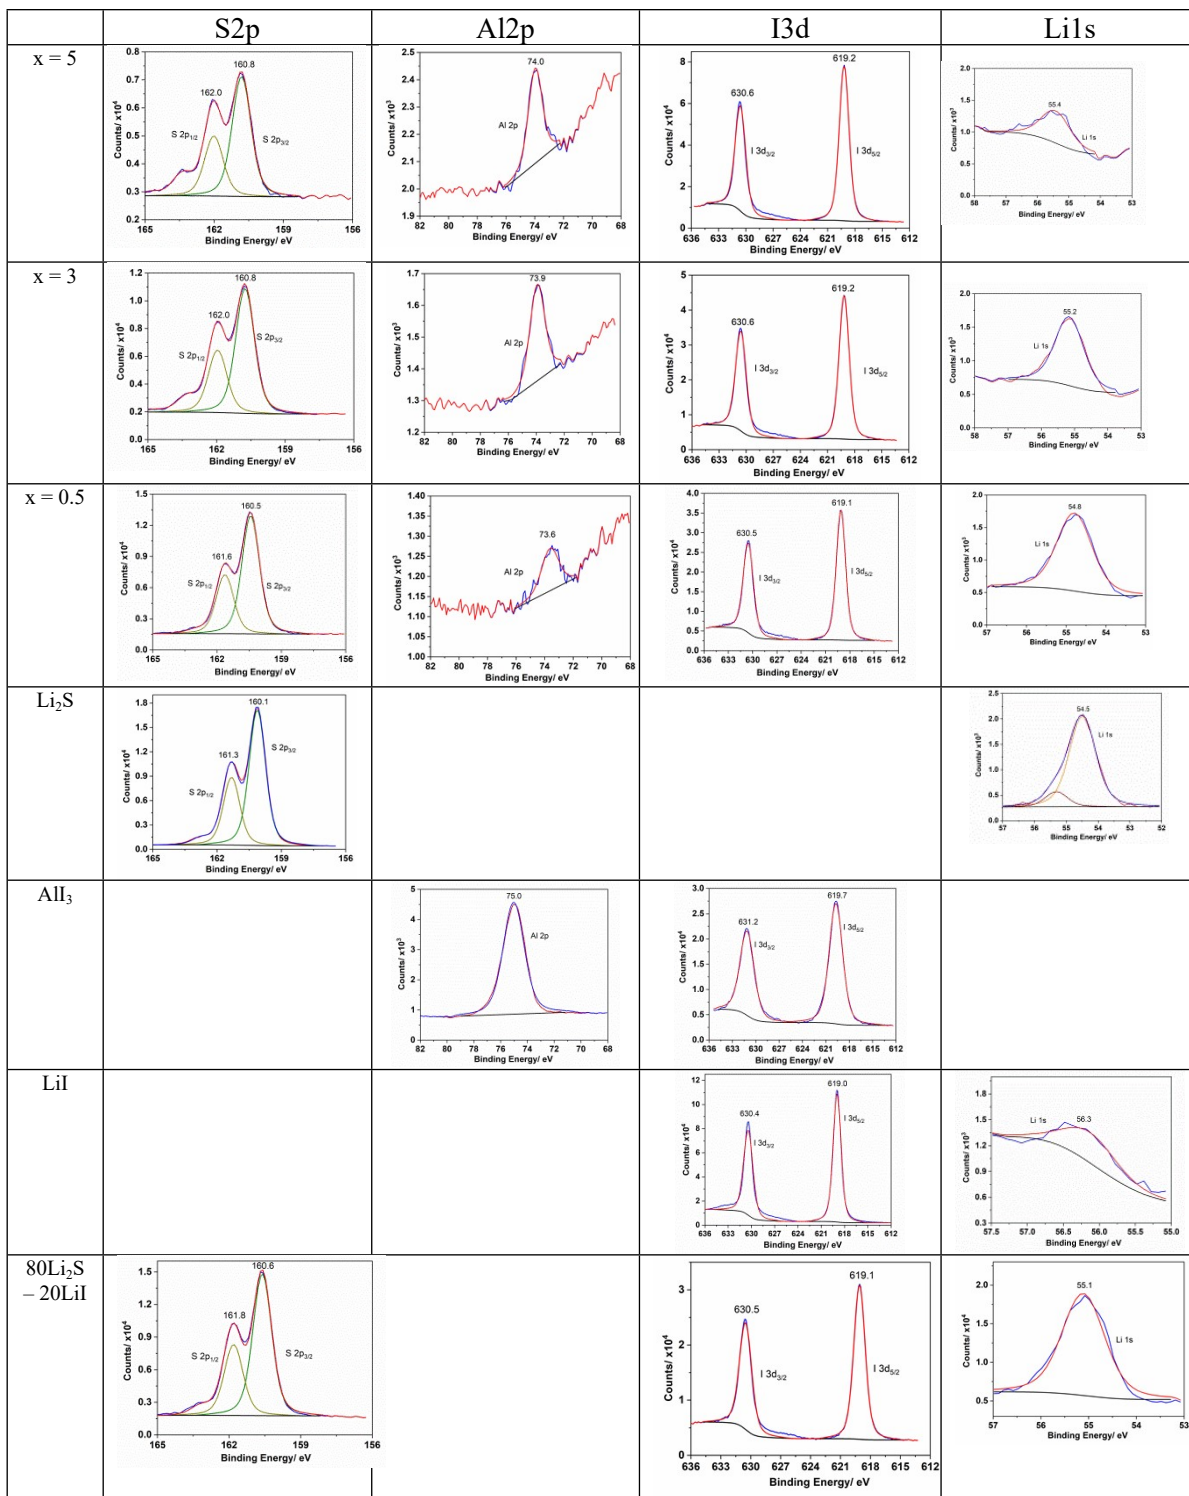

Fig. S2. X-ray photoelectron spectroscopy spectra of the prepared samples and standard materials.

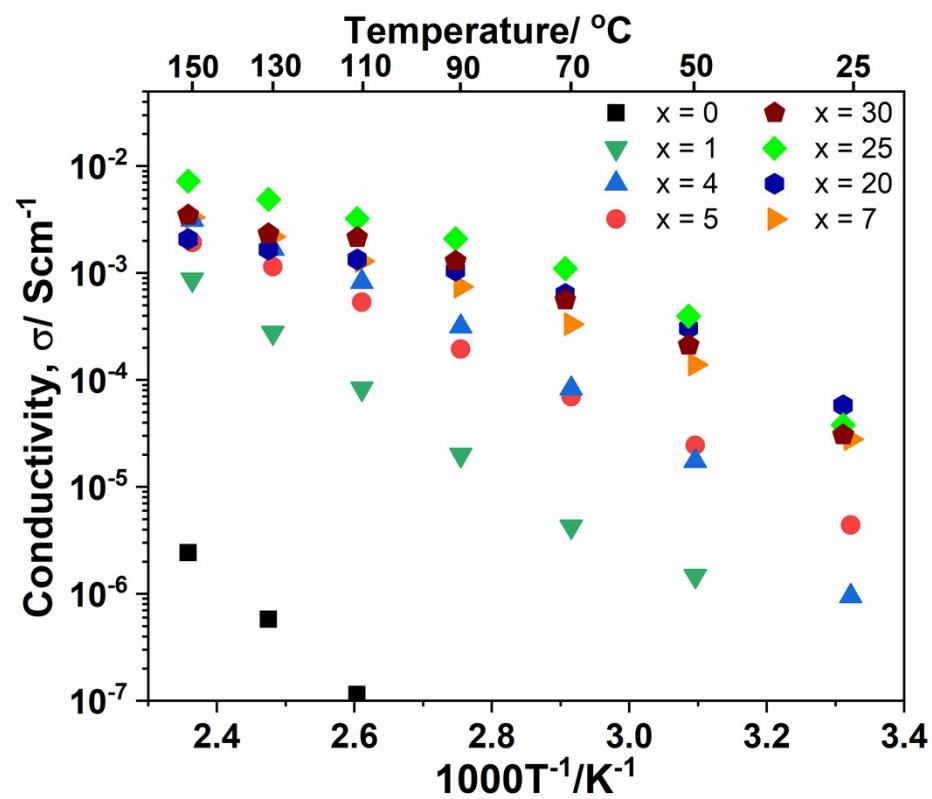

Fig. S3. Temperature dependence of ionic conductivity of  $(100-x)\text{Li}_2\text{S} \cdot x\text{AlI}_3$ .

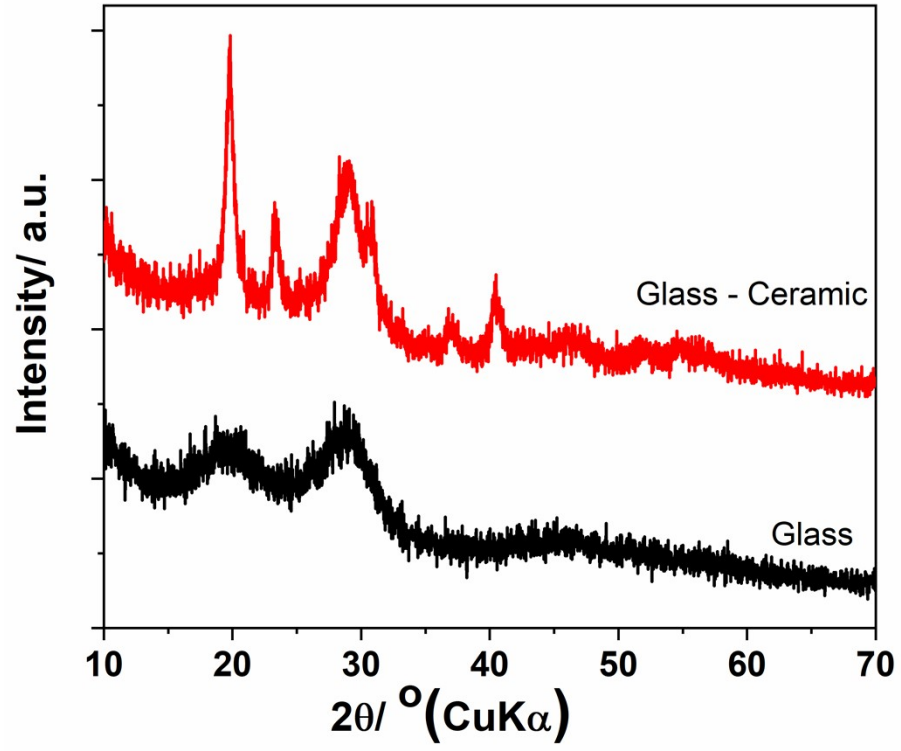

Fig. S4. X-ray diffraction patterns of  $\text{Li}_{10}\text{P}_3\text{S}_{12}\text{I}$  solid electrolytes.

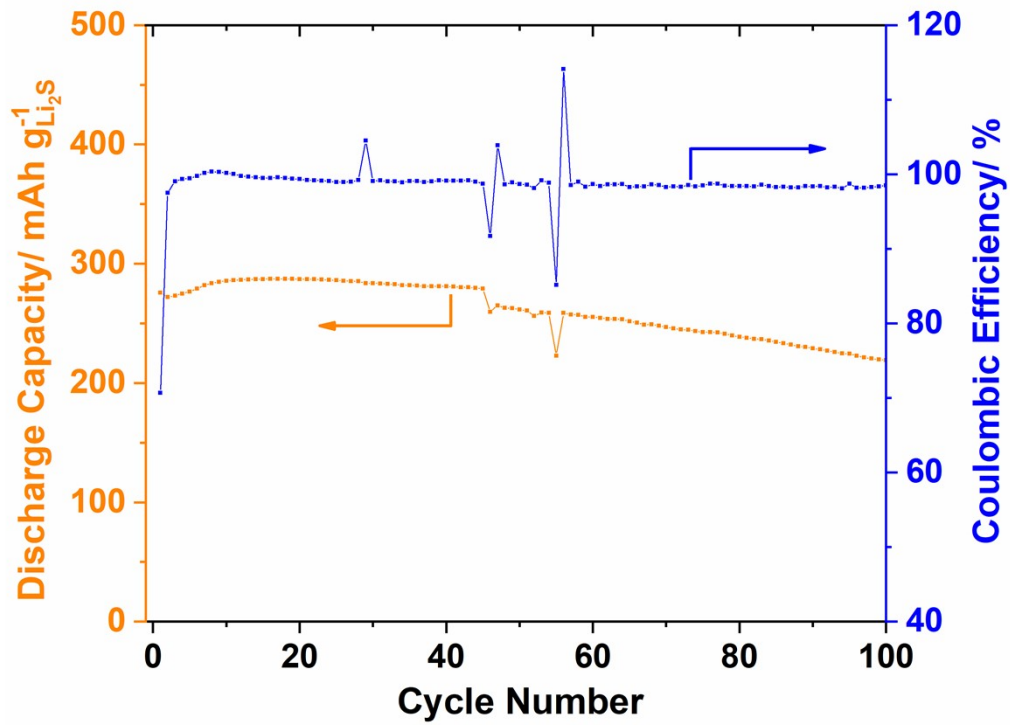

Fig. S5. Cyclic property at room temperature of the all-solid-state Li-S cell employing 80(95Li<sub>2</sub>S·5AlI<sub>3</sub>)–20Ketjen Black (KB) composite as the positive electrode composite (without Li<sub>10</sub>P<sub>3</sub>S<sub>12</sub>I solid electrolyte in the positive electrode).

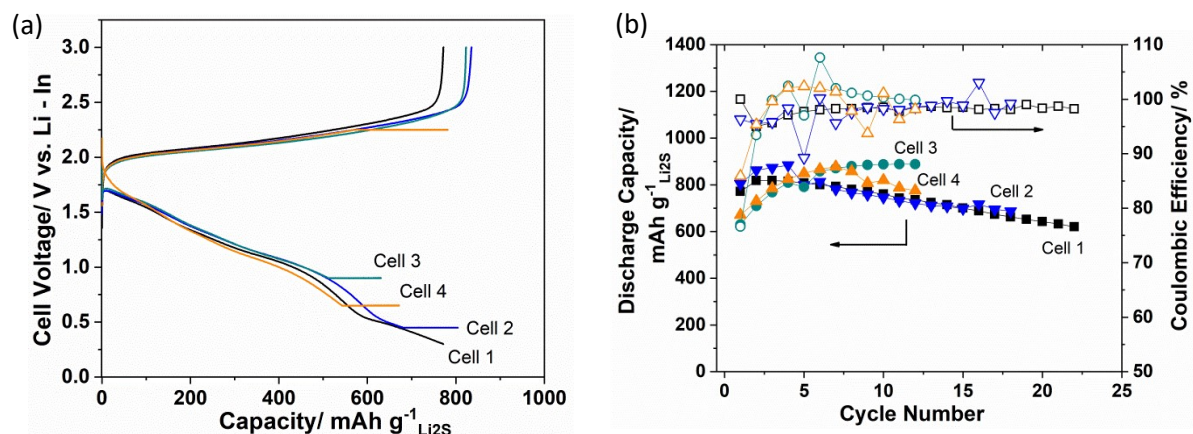

Fig. S6. Performances of four cells with different cut-off voltages. (a) charge–discharge curves at the first cycle; (b) cyclic properties of the cells.

- Cell construction:

Positive electrode: 50(97Li<sub>2</sub>S·3AlI<sub>3</sub>)–40Li<sub>10</sub>P<sub>3</sub>S<sub>12</sub>I–10Ketjen Black (KB), ~4 mg

Separator: Li<sub>10</sub>P<sub>3</sub>S<sub>12</sub>I, ~80 mg

Negative electrode: In–Li alloy

- Charge–discharge conditions:

For the first cycle:

Cell 1: CC mode, 0.1C (about 0.25 mA cm<sup>-2</sup>), cut-off voltage 3.0–0.3 V vs. Li–In

Cell 2: charge with CC mode (0.1C), cut-off voltage 3.0 V vs. Li–In discharge with CC–CV mode: 0.1C with CC mode until 0.45 V vs. Li–In, then change to CV mode at 0.45 V until the current reaches 0.01 mA

Cell 3: charge with CC mode (0.1C), cut-off voltage 3.0 V vs. Li–In discharge with CC–CV mode: 0.1C with CC mode until 0.90 V vs. Li–In, then change to CV mode at 0.90 V until the current reaches 0.01 mA

Cell 4: charge with CC–CV mode: 0.1C with CC mode to 2.25 V vs. Li–In, then change to CV mode at 2.25 V until the current reaches 0.01 mA discharge with CC–CV mode: 0.1C with CC mode until 0.65 V vs. Li–In, then change to CV mode at 0.65 V until the current reaches 0.01 mA

From the second cycle: The discharge modes were maintained as previously described; the charge mode was changed to 0.1C with CC mode to 2.25 V vs. Li-In, then change to CV mode at 2.25 V until the current reaches 0.01 mA
